# Supplementary material for: Bacillus subtilis Spore Resistance to Simulated Mars Surface Conditions
Source: Front Microbiol. 2019 Feb 26;10:333. doi: 10.3389/fmicb.2019.00333 (PMC6399134; doi:10.3389/fmicb.2019.00333)
Supplement: Supplementary file 2 [file Data_Sheet_2.ZIP]

Archive with 22 entries (22 files):
- Figure_1_Cortesao et al_Bacillus subtilis spore resistance to simulated Mars surface conditions.tif
- Figure_2_Cortesao et al_Bacillus subtilis spore resistance to simulated Mars surface conditions.tif
- Figure_2and3_Cortesao et al_Bacillus subtilis spore resistance to simulated Mars surface conditions.tif
- Figure_3_Cortesao et al_Bacillus subtilis spore resistance to simulated Mars surface conditions.tif
- Figure_4_Cortesao et al_Bacillus subtilis spore resistance to simulated Mars surface conditions.tif
- revised manuscript.docx
- revised manuscript.pdf
- revised supplemental material.docx
- revised supplemental material.pdf
- Supp_10_Cortesao et al_Bacillus subtilis spore resistance to simulated Mars surface conditions.tif
- Supp_11_Cortesao et al_Bacillus subtilis spore resistance to simulated Mars surface conditions.tif
- Supp_12_Cortesao et al_Bacillus subtilis spore resistance to simulated Mars surface conditions.tif
- Supp_13_Cortesao et al_Bacillus subtilis spore resistance to simulated Mars surface conditions.tif
- Supp_1_Cortesao et al_Bacillus subtilis spore resistance to simulated Mars surface conditions.tif
- Supp_2_Cortesao et al_Bacillus subtilis spore resistance to simulated Mars surface conditions.tif
- Supp_3_Cortesao et al_Bacillus subtilis spore resistance to simulated Mars surface conditions.tif
- Supp_4_Cortesao et al_Bacillus subtilis spore resistance to simulated Mars surface conditions.tif
- Supp_5_Cortesao et al_Bacillus subtilis spore resistance to simulated Mars surface conditions.tif
- Supp_6_Cortesao et al_Bacillus subtilis spore resistance to simulated Mars surface conditions.tif
- Supp_7_Cortesao et al_Bacillus subtilis spore resistance to simulated Mars surface conditions.tif
- Supp_8_Cortesao et al_Bacillus subtilis spore resistance to simulated Mars surface conditions.tif
- Supp_9_Cortesao et al_Bacillus subtilis spore resistance to simulated Mars surface conditions.tif
